# Supplementary material for: A facile route to a high-quality graphene/MoS2vertical field-effect transistor with gate-modulated photocurrent response
Source: Royal Society of Chemistry journal article supplement (doi:10.1039/c6tc04716e), 2017-01-01
Supplement: c6tc04716e1.pdf [file c6tc04716e1.pdf]

## Supplementary Information

# Facile route to a high-quality graphene/MoS<sub>2</sub> vertical field-effect transistor with gate-modulated photocurrent response

M. Farooq Khan<sup>1</sup>, M. Arslan Shehzad<sup>2</sup>, M. Zahir Iqbal<sup>3</sup>, M. Waqas Iqbal<sup>4</sup>, Ghazanfar Nazir<sup>1</sup>, Yongho Seo<sup>2</sup> and Jonghwa Eom<sup>1\*</sup>

<sup>1</sup> Department of Physics & Astronomy and Graphene Research Institute, Sejong University, Seoul 05006, Korea

<sup>2</sup> Faculty of Nanotechnology & Advanced Materials Engineering and Graphene Research Institute, Sejong University, Seoul 05006, Korea

<sup>3</sup> Faculty of Engineering Sciences, GIK Institute of Engineering Sciences and Technology, Topi 23640, Khyber Pakhtunkhwa, Pakistan

<sup>4</sup> Department of Physics, Riphah International University, Lahore, Pakistan

\*E mail: eom@sejong.ac.kr

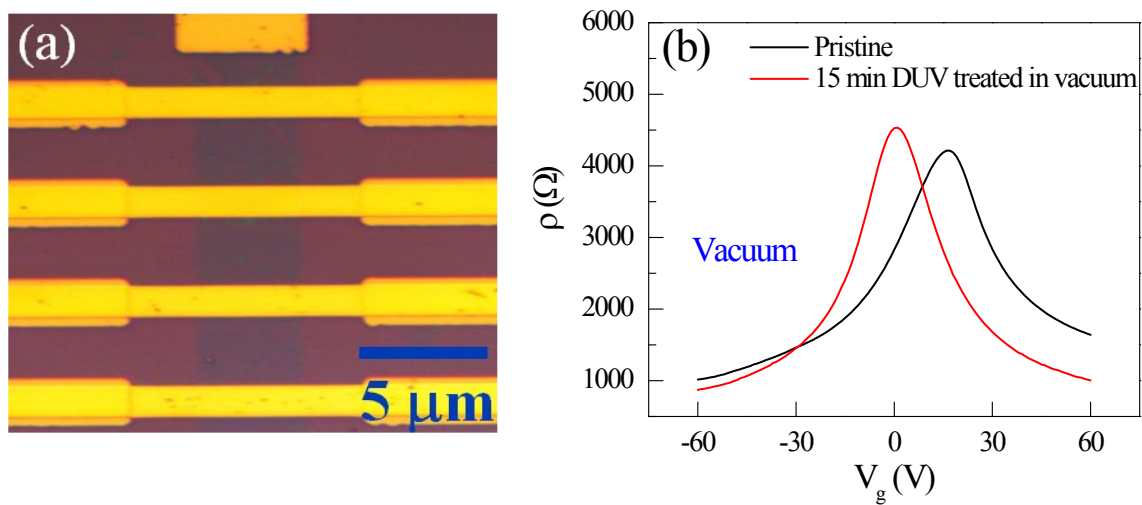

**Figure S1. Device fabrication and electrical transport measurement of planar graphene FET device. (a)** Optical image of graphene FET device. **(b)** Transfer characteristics (resistivity as function of  $V_g$ ) of pristine and DUV treated graphene FETs.

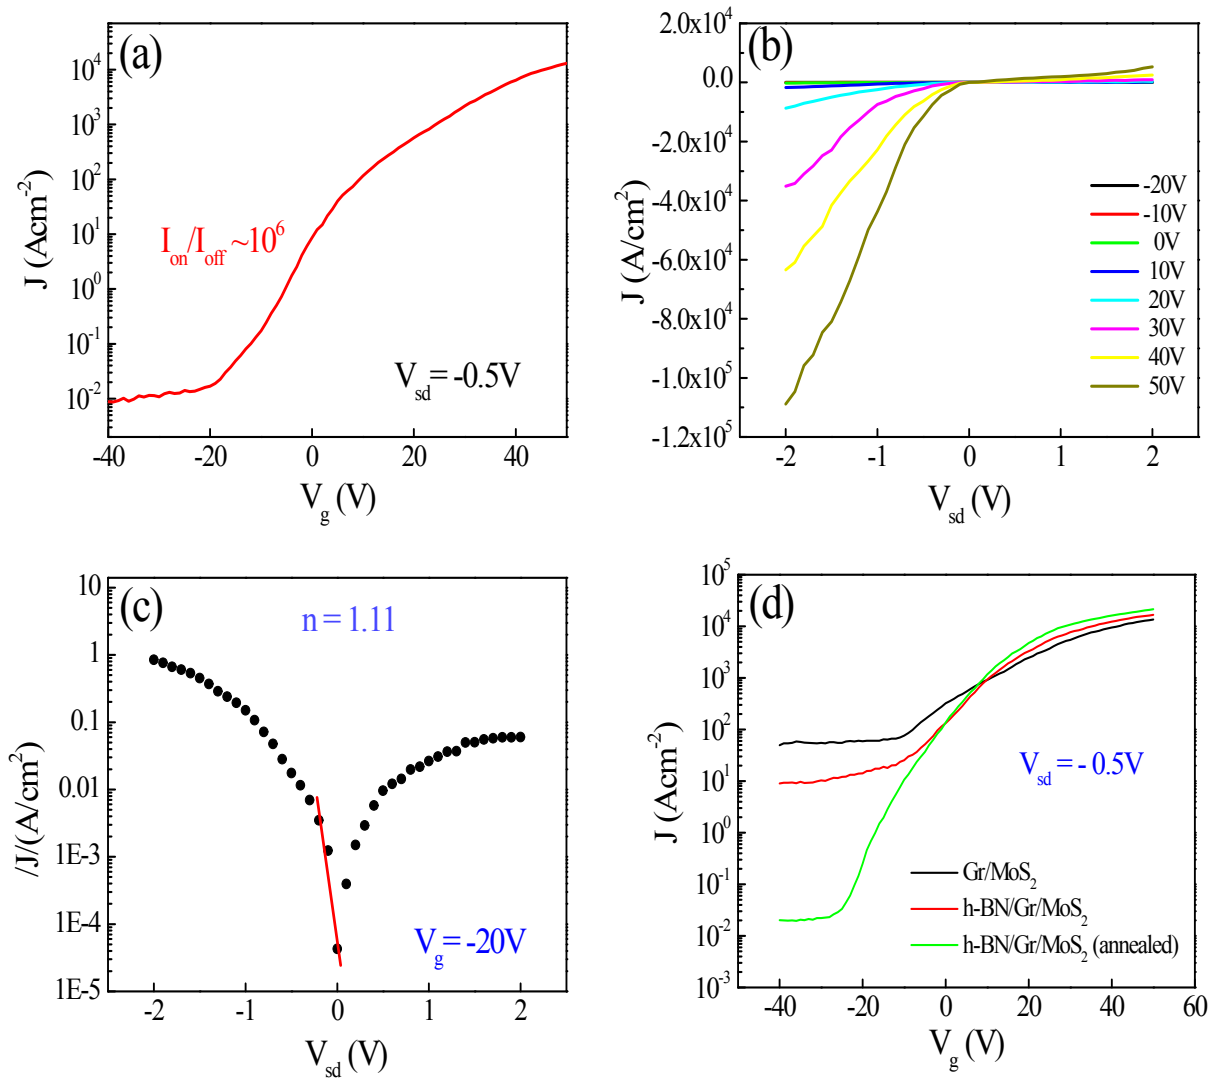

**Figure S2. Electrical transport measurement of vertical MoS<sub>2</sub> FET device. (a)**  $J$ - $V_g$  transfer characteristics of h-BN/Gr/MoS<sub>2</sub>/Mo FET. **(b)** Current density versus  $V_{sd}$  of vertical FET device. **(c)**  $J$ - $V$  curve at  $V_g = -20$  V for vertical FET. The ideality factor was identified by linear regression (red line). **(d)** Transfer characteristics of Gr/MoS<sub>2</sub> devices. The ON-OFF ratio was enhanced with h-BN substrate, and then further enhanced after the annealing in a high vacuum ( $\sim 10^{-6}$  torr) at 200 °C.

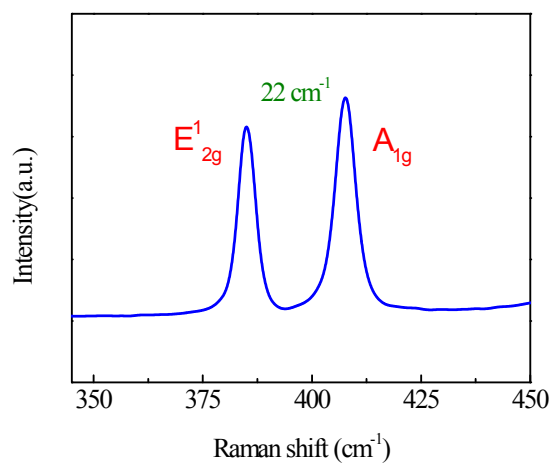

**Figure S3. Raman spectrum of FL MoS<sub>2</sub> flake in the planar MoS<sub>2</sub> FET device.** The gap between two peaks is ~22 cm<sup>-1</sup>, which suggests that the flake is not more than 4 or 5 layers.
